# Supplementary material for: Effects of Feeding a Hypoallergenic Diet with a Nutraceutical on Fecal Dysbiosis Index and Clinical Manifestations of Canine Atopic Dermatitis
Source: MDPI journal article supplement (doi:10.3390/ani11102985), 2021-10-16
Supplement: s1 [file s1]

| ID  | Study Day | DYSBIOSIS INDEX | log DNA total | log DNA <i>Faecalibacterium</i> | log DNA <i>Turicibacter</i> | log DNA <i>Streptococcus</i> | log DNA <i>E. coli</i> | log DNA <i>Blautia</i> | log DNA <i>Fusobacterium</i> | log DNA <i>C. hiranonis</i> |
|-----|-----------|-----------------|---------------|---------------------------------|-----------------------------|------------------------------|------------------------|------------------------|------------------------------|-----------------------------|
| CC3 | 0         | 3,24            | 11,80         | 4,59                            | 5,88                        | 6,71                         | 6,74                   | 10,66                  | 5,72                         | 1,17                        |
| CC3 | 30        | 2,65            | 12,04         | 6,04                            | 6,52                        | 5,66                         | 6,09                   | 10,72                  | 6,12                         | 1,89                        |
| CC3 | 60        | 0,12            | 12,91         | 5,92                            | 7,11                        | 4,96                         | 5,74                   | 11,64                  | 6,25                         | 2,65                        |
| CC3 | 90        | -0,35           | 13,92         | 6,33                            | 7,47                        | 3,88                         | 5,39                   | 11,76                  | 6,68                         | 2,89                        |
| CC3 | 120       | -1,25           | 12,79         | 6,98                            | 7,01                        | 3,75                         | 4,91                   | 11,56                  | 6,54                         | 3,32                        |
| CC4 | 0         | 3,69            | 11,44         | 5,39                            | 6,96                        | 8,75                         | 8,11                   | 11,28                  | 5,67                         | 1,68                        |
| CC4 | 30        | 3,12            | 11,78         | 5,81                            | 7,00                        | 8,26                         | 6,37                   | 11,62                  | 6,21                         | 2,15                        |
| CC4 | 60        | 1,02            | 12,68         | 6,44                            | 7,44                        | 7,60                         | 5,85                   | 12,63                  | 6,34                         | 2,88                        |
| CC4 | 90        | -0,23           | 13,55         | 6,62                            | 7,62                        | 6,52                         | 5,54                   | 13,31                  | 6,12                         | 3,45                        |
| CC4 | 120       | -0,66           | 12,69         | 6,54                            | 7,62                        | 5,41                         | 5,32                   | 12,82                  | 6,01                         | 3,25                        |
| EG8 | 0         | 4,36            | 10,45         | 5,52                            | 5,14                        | 5,89                         | 6,94                   | 10,44                  | 7,17                         | 2,15                        |
| EG8 | 30        | 2,15            | 11,25         | 5,22                            | 6,03                        | 4,66                         | 6,11                   | 10,86                  | 7,25                         | 3,65                        |
| EG8 | 60        | 0,13            | 11,99         | 6,53                            | 6,99                        | 4,01                         | 5,35                   | 11,35                  | 8,01                         | 3,99                        |
| EG8 | 90        | 0,03            | 12,03         | 5,31                            | 7,01                        | 3,56                         | 5,32                   | 12,01                  | 7,99                         | 4,01                        |
| EG8 | 120       | -0,35           | 12,45         | 6,59                            | 6,85                        | 3,24                         | 5,12                   | 11,88                  | 7,65                         | 3,85                        |
| ER6 | 0         | 3,64            | 10,87         | 4,33                            | 4,63                        | 6,44                         | 4,53                   | 11,56                  | 5,34                         | 2,56                        |
| ER6 | 30        | 2,45            | 11,37         | 4,48                            | 5,42                        | 5,80                         | 4,14                   | 11,66                  | 5,86                         | 3,45                        |
| ER6 | 60        | 1,32            | 12,19         | 4,33                            | 6,45                        | 4,54                         | 5,62                   | 12,26                  | 5,87                         | 4,70                        |
| ER6 | 90        | -0,17           | 12,12         | 3,89                            | 6,22                        | 4,20                         | 3,48                   | 12,99                  | 5,69                         | 4,93                        |
| ER6 | 120       | -1,69           | 12,15         | 4,06                            | 6,14                        | 3,78                         | 3,19                   | 13,02                  | 5,93                         | 4,77                        |
| ER7 | 0         | 3,59            | 10,64         | 4,84                            | 6,78                        | 7,96                         | 7,04                   | 10,45                  | 6,20                         | 2,86                        |
| ER7 | 30        | 3,18            | 11,28         | 5,43                            | 6,72                        | 6,81                         | 6,26                   | 11,52                  | 6,38                         | 3,45                        |
| ER7 | 60        | -1,26           | 12,40         | 5,30                            | 7,68                        | 6,21                         | 5,76                   | 12,07                  | 6,81                         | 4,22                        |
| ER7 | 90        | -0,54           | 12,66         | 5,71                            | 6,02                        | 5,13                         | 5,26                   | 12,14                  | 6,60                         | 5,12                        |
| ER7 | 120       | -0,02           | 12,29         | 5,01                            | 5,44                        | 5,00                         | 4,72                   | 12,62                  | 6,88                         | 6,05                        |
| LG6 | 0         | 4,32            | 11,55         | 5,12                            | 5,28                        | 8,76                         | 7,21                   | 11,50                  | 7,25                         | 2,63                        |
| LG6 | 30        | 2,12            | 11,95         | 5,21                            | 6,38                        | 7,60                         | 6,86                   | 11,71                  | 7,66                         | 3,61                        |
| LG6 | 60        | 0,08            | 12,74         | 5,62                            | 6,57                        | 6,98                         | 5,56                   | 12,20                  | 7,17                         | 4,15                        |
| LG6 | 90        | 0,01            | 12,35         | 5,79                            | 7,42                        | 6,76                         | 5,14                   | 12,86                  | 7,76                         | 4,69                        |
| LG6 | 120       | 0,03            | 12,02         | 6,35                            | 8,63                        | 6,44                         | 5,02                   | 13,01                  | 7,51                         | 5,32                        |
| LG7 | 0         | 3,25            | 11,55         | 4,78                            | 4,72                        | 7,10                         | 6,28                   | 9,08                   | 7,68                         | 4,43                        |
| LG7 | 30        | 1,21            | 11,98         | 5,13                            | 4,81                        | 5,83                         | 5,16                   | 9,74                   | 8,10                         | 5,11                        |
| LG7 | 60        | 0,36            | 12,38         | 4,48                            | 5,89                        | 4,32                         | 4,89                   | 10,31                  | 8,92                         | 5,42                        |
| LG7 | 90        | -0,15           | 13,45         | 4,96                            | 6,42                        | 3,42                         | 4,65                   | 11,03                  | 8,59                         | 5,68                        |
| LG7 | 120       | -0,13           | 12,76         | 4,48                            | 7,02                        | 3,07                         | 4,32                   | 10,78                  | 8,66                         | 5,68                        |
| LG8 | 0         | 5,96            | 11,70         | 3,83                            | 6,22                        | 6,69                         | 5,07                   | 11,63                  | 5,68                         | 4,11                        |
| LG8 | 30        | 2,32            | 12,06         | 4,39                            | 6,52                        | 6,36                         | 4,51                   | 11,68                  | 6,64                         | 5,27                        |
| LG8 | 60        | 1,37            | 12,86         | 4,79                            | 7,74                        | 5,44                         | 4,15                   | 11,00                  | 7,14                         | 6,43                        |
| LG8 | 90        | 0,21            | 13,84         | 5,19                            | 8,15                        | 5,21                         | 3,71                   | 11,05                  | 6,49                         | 7,28                        |
| LG8 | 120       | -0,01           | 12,65         | 6,34                            | 9,14                        | 5,09                         | 3,51                   | 10,65                  | 7,87                         | 7,28                        |
| NF5 | 0         | 5,64            | 11,21         | 3,73                            | 5,42                        | 7,86                         | 5,28                   | 10,43                  | 5,58                         | 4,13                        |
| NF5 | 30        | 2,32            | 12,03         | 4,19                            | 5,72                        | 6,60                         | 4,16                   | 11,01                  | 6,54                         | 5,03                        |
| NF5 | 60        | 1,35            | 12,94         | 4,87                            | 6,94                        | 6,88                         | 3,89                   | ,11,68                 | 7,04                         | 5,99                        |

|     |     |       |       |      |      |      |      |       |      |      |
|-----|-----|-------|-------|------|------|------|------|-------|------|------|
| NF5 | 90  | -0,21 | 12,76 | 5,22 | 7,35 | 5,76 | 3,65 | 12,01 | 6,39 | 6,01 |
| NF5 | 120 | -1,32 | 12,31 | 6,13 | 8,34 | 5,44 | 3,32 | 11,99 | 7,77 | 5,86 |
| NF6 | 0   | 4,09  | 11,93 | 3,86 | 6,59 | 8,01 | 6,07 | 10,66 | 6,26 | 4,12 |
| NF6 | 30  | 1,05  | 12,03 | 4,61 | 7,48 | 6,92 | 6,51 | 11,58 | 6,47 | 5,23 |
| NF6 | 60  | 1,01  | 12,35 | 4,21 | 7,53 | 5,66 | 5,15 | 12,03 | 6,86 | 5,87 |
| NF6 | 90  | -1,22 | 12,47 | 3,99 | 8,01 | 4,46 | 4,71 | 12,35 | 6,47 | 6,12 |
| NF6 | 120 | -1,15 | 12,03 | 3,33 | 7,88 | 4,09 | 4,51 | 12,59 | 6,43 | 6,54 |
| RS3 | 0   | 3,09  | 10,96 | 5,32 | 4,41 | 6,30 | 4,73 | 10,05 | 7,12 | 1,28 |
| RS3 | 30  | 0,05  | 11,01 | 7,17 | 5,03 | 5,81 | 3,74 | 10,54 | 7,96 | 2,20 |
| RS3 | 60  | 0,01  | 11,26 | 6,32 | 6,46 | 5,44 | 3,14 | 11,36 | 8,28 | 3,16 |
| RS3 | 90  | -0,22 | 11,17 | 5,96 | 7,61 | 4,89 | 2,95 | 11,69 | 8,08 | 3,99 |
| RS3 | 120 | -0,15 | 11,07 | 5,51 | 6,82 | 4,29 | 2,65 | 12,01 | 7,60 | 4,09 |
| RS4 | 0   | 2,25  | 9,22  | 2,83 | 4,63 | 6,44 | 5,82 | 8,97  | 7,25 | 3,68 |
| RS4 | 30  | -1,78 | 11,05 | 6,62 | 5,78 | 5,85 | 4,69 | 10,96 | 7,66 | 4,87 |
| RS4 | 60  | -2,74 | 11,69 | 6,85 | 6,83 | 5,15 | 3,80 | 11,34 | 7,98 | 5,78 |
| RS4 | 90  | -0,44 | 11,53 | 5,96 | 7,61 | 4,28 | 2,90 | 12,03 | 7,95 | 6,20 |
| RS4 | 120 | -0,60 | 11,42 | 6,37 | 8,83 | 3,97 | 2,48 | 11,93 | 7,56 | 6,68 |
| RS5 | 0   | 4,02  | 10,45 | 5,12 | 4,85 | 5,44 | 4,72 | 9,94  | 6,15 | 2,65 |
| RS5 | 30  | 3,25  | 11,02 | 5,22 | 5,55 | 4,75 | 3,58 | 11,85 | 6,56 | 3,84 |
| RS5 | 60  | 1,21  | 11,99 | 5,66 | 6,24 | 4,03 | 2,75 | 12,14 | 6,88 | 4,77 |
| RS5 | 90  | -0,03 | 12,01 | 4,88 | 6,89 | 3,56 | 1,99 | 13    | 6,85 | 5,12 |
| RS5 | 120 | -0,15 | 12,36 | 6,25 | 6,45 | 2,99 | 1,45 | 12,96 | 6,46 | 5,63 |

**Supplementary Table S1.** Abundance of bacterial taxa and calculated Dysbiosis Index of dogs at different study days.
